# Supplementary material for: Co-delivery of glycyrrhizin and doxorubicin by alginate nanogel particles attenuates the activation of macrophage and enhances the therapeutic efficacy for hepatocellular carcinoma
Source: PubMed Central journal article supplement (PMC6735516; doi:10.7150/thno.35972), 2019-08-14
Supplement: thnov09p6239s1.pdf [file thnov09p6239s1.pdf]

**Table S1. The real-time RT-PCR oligonucleotide primers.**

| Gene                            | Primer  | Sequence(5'-3')      | PCR product (bp) |
|---------------------------------|---------|----------------------|------------------|
| $\beta$ -actin<br>(NM_007393.3) | Forward | TGTTACCAACTGGGACGACA | 165              |
|                                 | Reverse | GGGGTGTGTAAGGTCTCAAA |                  |
| Bax<br>(NM_007527.3)            | Forward | CTGCAGAGGATGATTGCTGA | 174              |
|                                 | Reverse | GATCAGCTCGGGCACTTTAG |                  |
| Bcl-2<br>(NM_177410.2)          | Forward | GGACTTGAAGTGCCATTGGT | 127              |
|                                 | Reverse | AGCCCCTCTGTGACAGCTTA |                  |
| Caspase-3<br>(NM_009810.2)      | Forward | ATGGGAGCAAGTCAGTGGAC | 137              |
|                                 | Reverse | CGTACCAGAGCGAGATGACA |                  |

**Table S2. Pharmacokinetic parameters of DOX after intravenous injection (i.v.) administration to rats in free DOX (f-Dox) and DOX/GL-ALG NGPs (n = 4).**

| Parameters                                      | f-DOX           | DOX/GL-ALG NGPs  |
|-------------------------------------------------|-----------------|------------------|
| T1/2 $\alpha$ (h)                               | 0.06 $\pm$ 0.01 | 0.5 $\pm$ 0.0**  |
| T1/2 $\beta$ (h)                                | 3.6 $\pm$ 0.1   | 16.5 $\pm$ 0.2** |
| AUC <sub>(0-24)</sub> (mg/L*h)                  | 1.1 $\pm$ 0.4   | 9.6 $\pm$ 0.4**  |
| AUC <sub>(0-<math>\infty</math>)</sub> (mg/L*h) | 3.4 $\pm$ 0.6   | 44.6 $\pm$ 1.6** |
| Cl (L/h)                                        | 5.1 $\pm$ 0.5   | 0.5 $\pm$ 0.04** |
| Vd (L)                                          | 8.9 $\pm$ 2.3   | 4.0 $\pm$ 0.5**  |

T1/2 $\alpha$ : The distribution half-life

T1/2 $\beta$ : The Elimination half-life.

AUC: Area under the plasma DOX concentration–time curves

Cl: the total clearance

Vd: the volume of distribution

\*\*  $P < 0.01$ , compared to free DOX.

**A**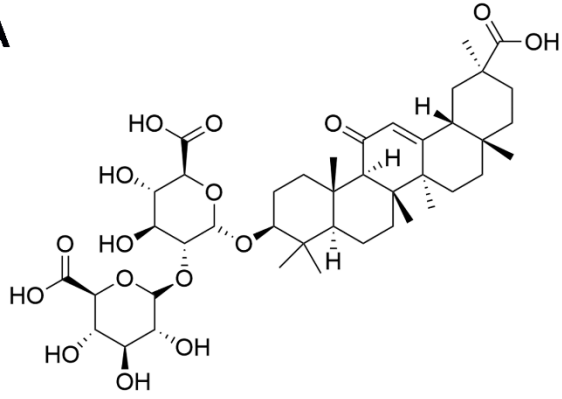**B**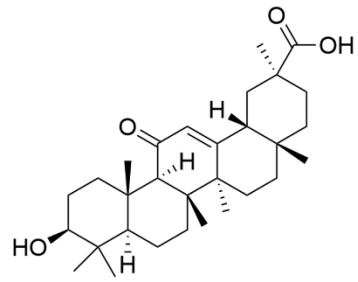

**Figure S1. The structure of glycyrrhizin (A) and glycyrrhetic acid (B).**

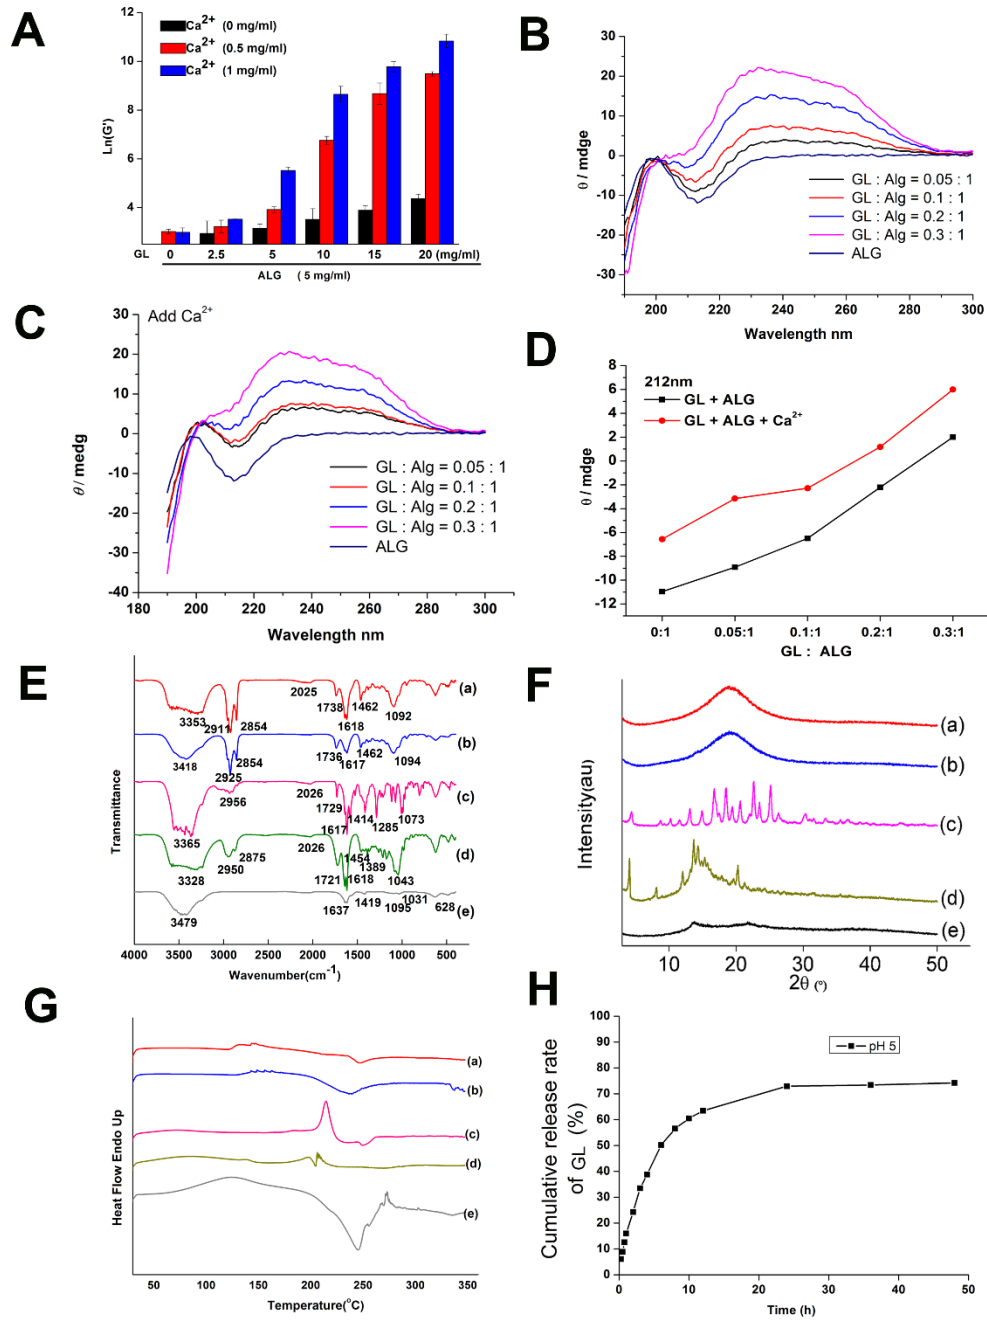

**Figure S2 The characterization of DOX/GL-ALG NGPs.** The different storage modulus  $G'$  values (A). CD value of alginate with adding GL (B). CD value of alginate with adding GL and Ca<sup>2+</sup> (C). CD value at wavelength 212 nm (D). FT-IR spectra (E); XRD patterns (F); DSC thermograms (G); (a) DOX/GL-ALG NGPs; (b) GL-ALG NGPs; (c) DOX; (d) GL; (e) SA. The release of GL in GL-ALG NGPs (H).

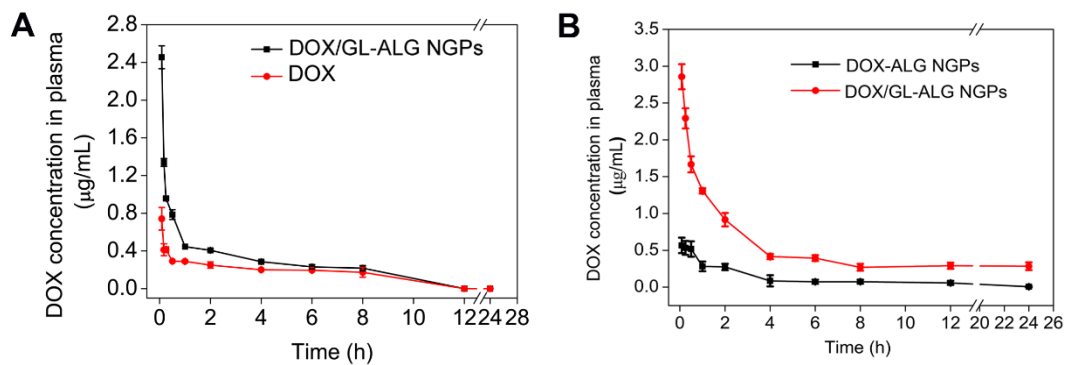

**Figure S3. Pharmacokinetic profiles in rats after i.v. administration of DOX solution, DOX-ALG NGPs and DOX/GL-ALG NGPs at a dose of 2.5 mg DOX-equiv./kg (n = 4). (Data were given as mean  $\pm$  SE, n=4).**

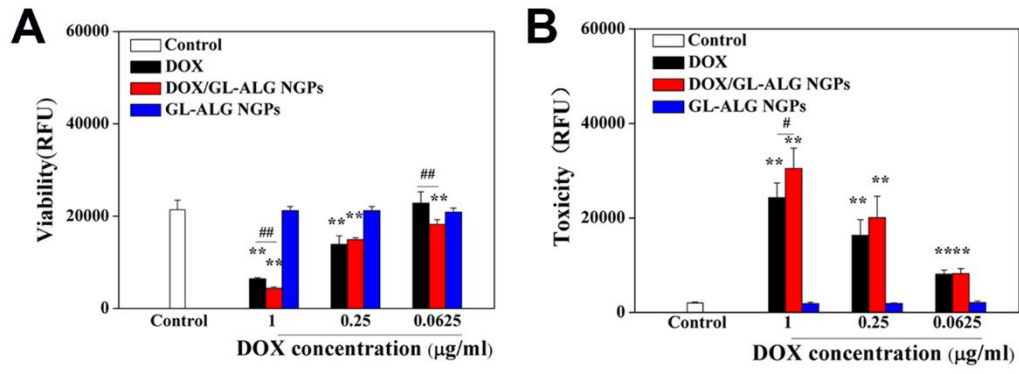

**Figure S4. Cell viability and toxicity of DOX/GL-ALG NGPs on hepatocellular carcinoma cell (HepG2).**  $**p < 0.01$ , compared with control group,  $##p < 0.01$ , compared with free DOX group.

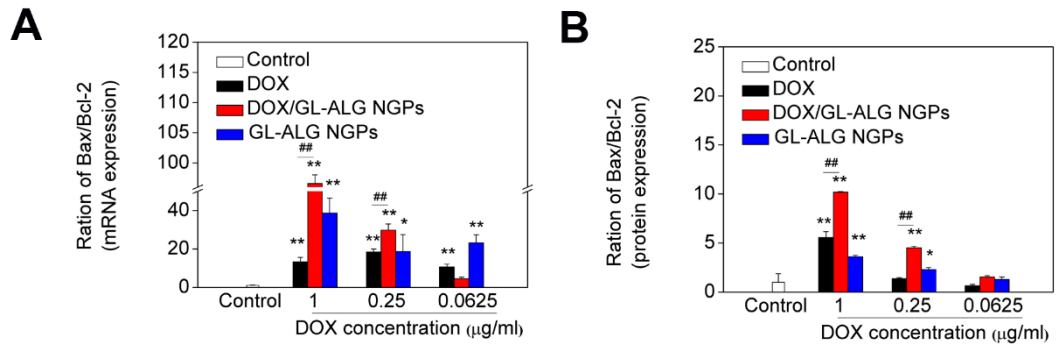

**Figure S5. The mRNA and protein expression ratio of Bax and Bcl-2 *in vitro*.** \*\*  $p < 0.01$ , compared with control group, ##  $p < 0.01$ , compared with free DOX group.

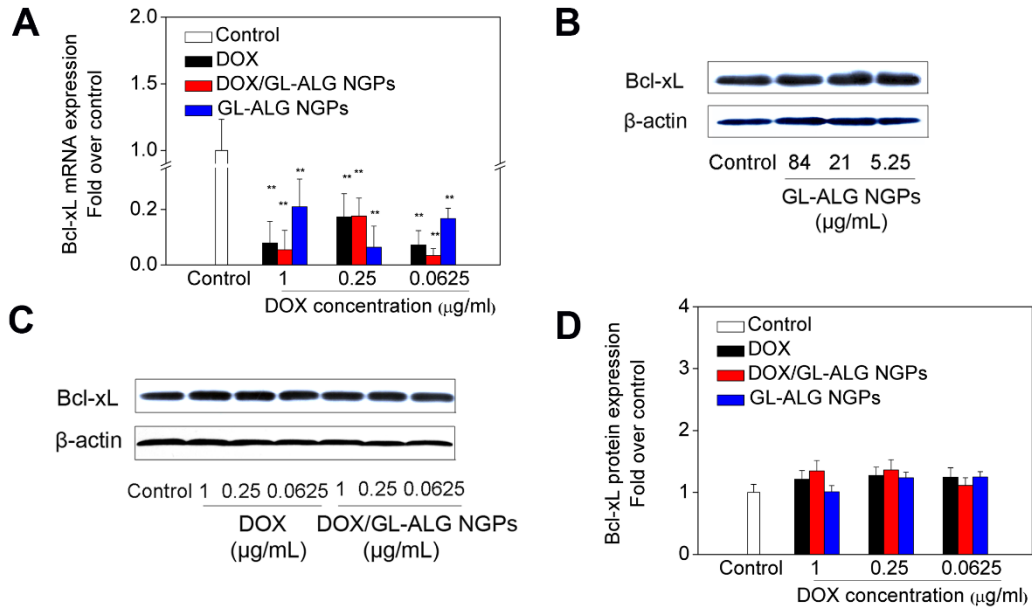

**Figure S6. The effect of DOX/GL-ALG NGPs on the mRNA and protein expression of Bcl-xL.** The mRNA expression of Bcl-xL (A) was detected by Real-time RT-PCR. The protein expression of Bcl-xL treating with GL-ALG NGPs (B) and DOX, DOX/ GL-ALG NGPs (C) was analyzed by Western Blot. The western blot film was scanned and the intensity (D) was quantified by Image J version 1.51n and normalized to the corresponding  $\beta$ -actin intensity and the controls. Values are means  $\pm$  S.D. (n=3) from three independent experiments.  $**p < 0.01$ , compared with control group.



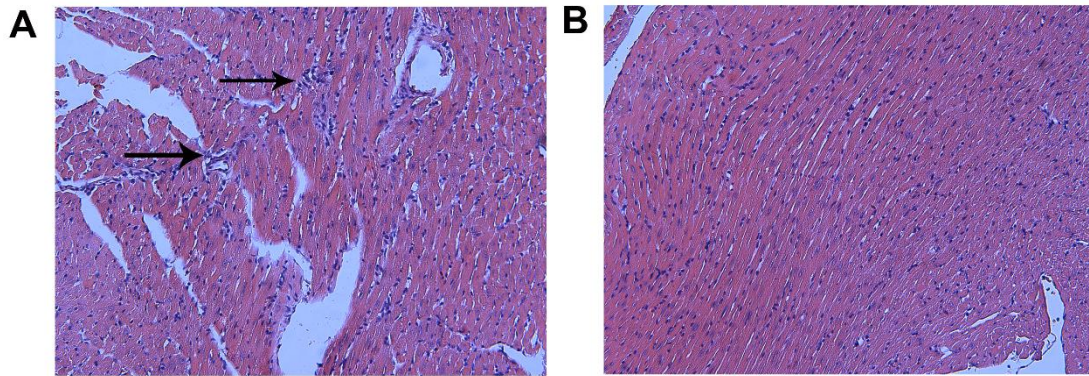

**Figure S7. The myocardial protection of GL on DOX induced cardiotoxicity in mice.** Sections of liver taken from mice received intravenous injections of DOX (4 mg/kg) (A), and co-delivering soluble GL along with DOX (4 mg/kg) (B). (Black arrows: inflammatory cell infiltration)

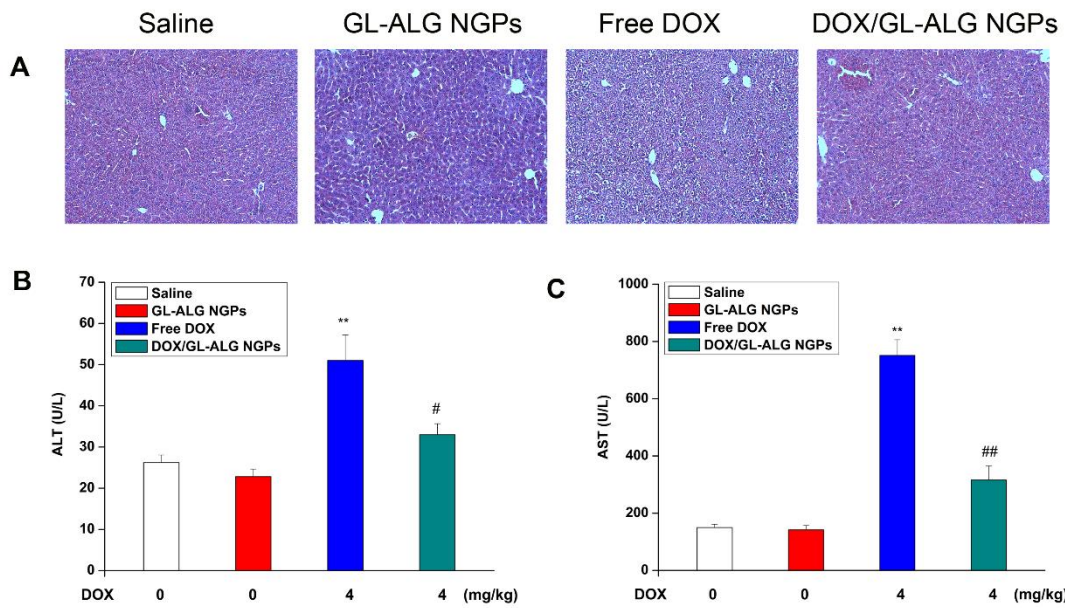

**Figure S8. The effect of DOX/GL-ALG NGPs on hepatotoxicity, AST and ALT levels in mice.** Sections of liver taken from animal received intravenous injections of saline, GL-ALG NGPs, DOX (4 mg/kg) or DOX/GL-ALG NGPs (4 mg/kg) (A). The liver enzyme levels of ALT (B) and AST (C) in mice plasma.

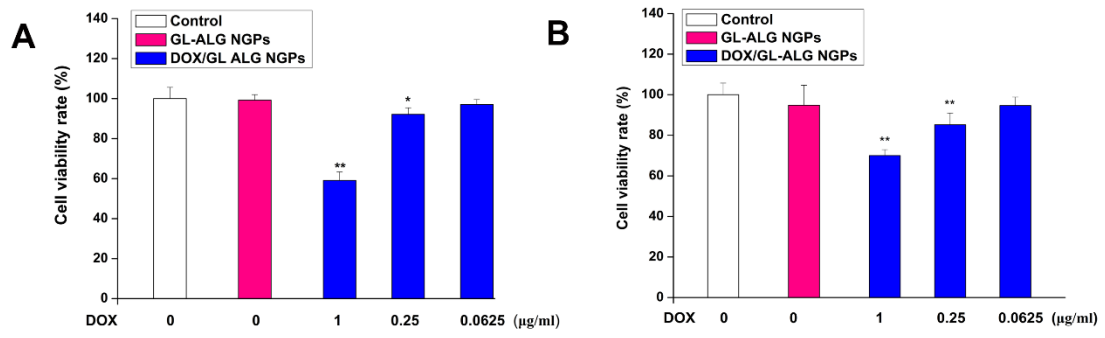

**Figure S9. Cell viability of DOX/GL-ALG NGPs on RAW264.7 cells (A) and L929 cells (B).** \*\*  $p < 0.01$ , compared with control group.
